# Supplementary material for: Wealth and mortality at older ages: a prospective cohort study
Source: PubMed Central journal article supplement — J Epidemiol Community Health. 2015 Oct 28;70(4):346–53. doi: 10.1136/jech-2015-206173 (PMC4819652; doi:10.1136/jech-2015-206173), 2015-10-28
Supplement: jech-2015-206173-s1.pdf [file jech-2015-206173-s1.pdf]

## Supplementary analyses

**Web Table 1: The association between household wealth and all-cause and cause-specific mortality by age among participants without chronic diseases at baseline<sup>a</sup>**

|                                  | 50-64 years               |                  |                   | ≥65 years                 |                  |                  |
|----------------------------------|---------------------------|------------------|-------------------|---------------------------|------------------|------------------|
|                                  | Household wealth tertiles |                  |                   | Household wealth tertiles |                  |                  |
|                                  | Wealthiest                | Intermediate     | Poorest           | Wealthiest                | Intermediate     | Poorest          |
| <b>All-cause mortality</b>       |                           |                  |                   |                           |                  |                  |
| No of deaths                     | 59                        | 72               | 95                | 277                       | 366              | 560              |
| Model 1 HR (95% CI) <sup>b</sup> | 1.00 (reference)          | 1.44 (1.02-2.03) | 2.64 (1.89-3.68)  | 1.00 (reference)          | 1.15 (0.99-1.35) | 1.59 (1.36-1.84) |
| Model 2 HR (95% CI) <sup>c</sup> | 1.00 (reference)          | 1.30 (0.92-1.84) | 1.86 (1.31-2.65)  | 1.00 (reference)          | 1.09 (0.93-1.27) | 1.34 (1.15-1.56) |
| Model 3 HR (95% CI) <sup>d</sup> | 1.00 (reference)          | 1.26 (0.89-1.78) | 1.76 (1.23-2.50)  | 1.00 (reference)          | 1.08 (0.92-1.26) | 1.33 (1.14-1.55) |
| <b>Cardiovascular mortality</b>  |                           |                  |                   |                           |                  |                  |
| No of deaths                     | 8                         | 16               | 30                | 75                        | 135              | 212              |
| Model 1 HR (95% CI) <sup>b</sup> | 1.00 (reference)          | 3.69 (1.47-9.25) | 7.77 (3.19-18.92) | 1.00 (reference)          | 1.46 (1.10-1.94) | 2.04 (1.56-2.68) |
| Model 2 HR (95% CI) <sup>c</sup> | 1.00 (reference)          | 3.33 (1.33-8.37) | 4.71 (1.88-11.81) | 1.00 (reference)          | 1.37 (1.03-1.82) | 1.72 (1.30-2.26) |
| Model 3 HR (95% CI) <sup>d</sup> | 1.00 (reference)          | 3.03 (1.21-7.65) | 4.20 (1.66-10.62) | 1.00 (reference)          | 1.34 (1.00-1.78) | 1.68 (1.27-2.21) |
| <b>Cancer mortality</b>          |                           |                  |                   |                           |                  |                  |
| No of deaths                     | 40                        | 34               | 36                | 98                        | 103              | 120              |
| Model 1 HR (95% CI) <sup>b</sup> | 1.00 (reference)          | 1.10 (0.70-1.74) | 1.54 (0.96-2.47)  | 1.00 (reference)          | 0.98 (0.74-1.29) | 1.18 (0.89-1.56) |
| Model 2 HR (95% CI) <sup>c</sup> | 1.00 (reference)          | 1.00 (0.63-1.58) | 1.15 (0.70-1.90)  | 1.00 (reference)          | 0.92 (0.70-1.22) | 1.01 (0.76-1.35) |
| Model 3 HR (95% CI) <sup>d</sup> | 1.00 (reference)          | 0.99 (0.62-1.57) | 1.15 (0.69-1.90)  | 1.00 (reference)          | 0.92 (0.69-1.22) | 1.01 (0.76-1.35) |
| <b>Other mortality</b>           |                           |                  |                   |                           |                  |                  |
| No of deaths                     | 15                        | 16               | 31                | 102                       | 129              | 234              |
| Model 1 HR (95% CI) <sup>b</sup> | 1.00 (reference)          | 1.40 (0.69-2.85) | 3.40 (1.77-6.50)  | 1.00 (reference)          | 1.10 (0.85-1.43) | 1.59 (1.25-2.03) |
| Model 2 HR (95% CI) <sup>c</sup> | 1.00 (reference)          | 1.30 (0.64-2.66) | 2.52 (1.27-4.97)  | 1.00 (reference)          | 1.04 (0.80-1.35) | 1.34 (1.04-1.73) |
| Model 3 HR (95% CI) <sup>d</sup> | 1.00 (reference)          | 1.29 (0.63-2.64) | 2.31 (1.16-4.62)  | 1.00 (reference)          | 1.05 (0.81-1.37) | 1.35 (1.05-1.73) |
| <b>Sample sizes</b>              |                           |                  |                   |                           |                  |                  |
| No of participants               | 1656                      | 1481             | 1071              | 1059                      | 1149             | 1213             |
| Person years of follow-up        | 17131                     | 15240            | 10813             | 9937                      | 10431            | 9904             |

HR = Hazard ratio; CI = Confidence interval

<sup>a</sup>Participants with any of the following self-reported doctor diagnosed diseases: heart disease, stroke, cancer (excluding minor skin cancers), psychiatric problems, and chronic lung disease were excluded from the analysis

<sup>b</sup>Adjusted for age, sex, and baseline marital status

<sup>c</sup>As model 1, plus adjustment for baseline smoking and physical activity

<sup>d</sup>As Model 2, plus adjustment for baseline elevated depressive symptoms and body mass index

**Web Table 2: Association between household wealth and all-cause and cause-specific mortality by age among participants with complete wealth data<sup>a</sup>**

|                                  | 50-64 years               |                   |                    | ≥65 years                 |                  |                  |
|----------------------------------|---------------------------|-------------------|--------------------|---------------------------|------------------|------------------|
|                                  | Household wealth tertiles |                   |                    | Household wealth tertiles |                  |                  |
|                                  | Wealthiest                | Intermediate      | Poorest            | Wealthiest                | Intermediate     | Poorest          |
| <b>All-cause mortality</b>       |                           |                   |                    |                           |                  |                  |
| No of deaths                     | 41                        | 63                | 149                | 198                       | 298              | 699              |
| Model 1 HR (95% CI) <sup>b</sup> | 1.00 (reference)          | 1.37 (0.93-2.04)  | 3.11 (2.18-4.43)   | 1.00 (reference)          | 1.08 (0.90-1.29) | 1.68 (1.42-1.97) |
| Model 2 HR (95% CI) <sup>c</sup> | 1.00 (reference)          | 1.25 (0.84-1.86)  | 2.01 (1.38-2.91)   | 1.00 (reference)          | 1.02 (0.85-1.22) | 1.34 (1.13-1.58) |
| Model 3 HR (95% CI) <sup>d</sup> | 1.00 (reference)          | 1.21 (0.82-1.80)  | 1.84 (1.26-2.70)   | 1.00 (reference)          | 1.01 (0.84-1.21) | 1.32 (1.11-1.56) |
| <b>Cardiovascular mortality</b>  |                           |                   |                    |                           |                  |                  |
| No of deaths                     | 4                         | 19                | 44                 | 64                        | 96               | 270              |
| Model 1 HR (95% CI) <sup>b</sup> | 1.00 (reference)          | 4.38 (1.49-12.89) | 10.36 (3.69-29.06) | 1.00 (reference)          | 1.10 (0.80-1.51) | 1.96 (1.48-2.60) |
| Model 2 HR (95% CI) <sup>c</sup> | 1.00 (reference)          | 3.78 (1.28-11.13) | 5.08 (1.76-14.65)  | 1.00 (reference)          | 1.05 (0.76-1.44) | 1.61 (1.21-2.15) |
| Model 3 HR (95% CI) <sup>d</sup> | 1.00 (reference)          | 3.56 (1.21-10.55) | 4.56 (1.56-13.32)  | 1.00 (reference)          | 1.01 (0.73-1.38) | 1.56 (1.16-2.08) |
| <b>Cancer mortality</b>          |                           |                   |                    |                           |                  |                  |
| No of deaths                     | 33                        | 31                | 57                 | 73                        | 111              | 157              |
| Model 1 HR (95% CI) <sup>b</sup> | 1.00 (reference)          | 0.84 (0.52-1.38)  | 1.50 (0.96-2.33)   | 1.00 (reference)          | 1.10 (0.82-1.48) | 1.17 (0.87-1.56) |
| Model 2 HR (95% CI) <sup>c</sup> | 1.00 (reference)          | 0.78 (0.48-1.28)  | 1.12 (0.69-1.80)   | 1.00 (reference)          | 1.04 (0.78-1.41) | 0.97 (0.72-1.30) |
| Model 3 HR (95% CI) <sup>d</sup> | 1.00 (reference)          | 0.76 (0.46-1.24)  | 1.03 (0.64-1.68)   | 1.00 (reference)          | 1.04 (0.77-1.40) | 0.96 (0.71-1.30) |
| <b>Other mortality</b>           |                           |                   |                    |                           |                  |                  |
| No of deaths                     | 4                         | 13                | 48                 | 61                        | 91               | 272              |
| Model 1 HR (95% CI) <sup>b</sup> | 1.00 (reference)          | 2.77 (0.90-8.52)  | 9.03 (3.21-25.39)  | 1.00 (reference)          | 1.06 (0.76-1.47) | 1.95 (1.46-2.60) |
| Model 2 HR (95% CI) <sup>c</sup> | 1.00 (reference)          | 2.57 (0.84-7.89)  | 5.85 (2.03-16.84)  | 1.00 (reference)          | 1.00 (0.72-1.39) | 1.46 (1.09-1.96) |
| Model 3 HR (95% CI) <sup>d</sup> | 1.00 (reference)          | 2.57 (0.83-7.88)  | 5.40 (1.85-15.73)  | 1.00 (reference)          | 1.00 (0.72-1.38) | 1.46 (1.08-1.96) |
| <b>Sample sizes</b>              |                           |                   |                    |                           |                  |                  |
| No of participants               | 875                       | 988               | 1058               | 631                       | 904              | 1366             |
| Person years of follow-up        | 9005                      | 10067             | 10378              | 5736                      | 8121             | 10742            |

HR = Hazard ratio; CI = Confidence interval

<sup>a</sup>Participants with incomplete data in any of the 22 wealth components were excluded from analysis. This exclusion applied to participants who had provided the upper and lower boundaries within which the values of the missing wealth components lay

<sup>b</sup>Adjusted for age, sex, and baseline marital status

<sup>c</sup>As model 1, plus adjustment for baseline smoking and physical activity

<sup>d</sup>As Model 2, plus adjustment for baseline elevated depressive symptoms and body mass index
